# Supplementary material
Source: PubMed Central journal article supplement (PMC5680052)
Supplement: IMM-152-648-s001.pdf [file IMM-152-648-s001.pdf]

**Supplementary Information.**

**Supplementary Table S1:** Characteristics of HC recruited in the study, related to Figure 1.

| Healthy control | Gender | Age [yrs] |
|-----------------|--------|-----------|
| HC1             | F      | 41        |
| HC2             | F      | 53        |
| HC3             | F      | 43        |
| HC4             | F      | 31        |
| HC5             | F      | 50        |
| HC6             | F      | 51        |

**Supplementary Table S2:** Characteristics of HC recruited in the study, related to Figure 3.

| Healthy control | Gender | Age [yrs] |
|-----------------|--------|-----------|
| HC7             | F      | 30        |
| HC8             | M      | 60        |
| HC9             | F      | 25        |
| HC10            | F      | 51        |

Supplementary Figure S1

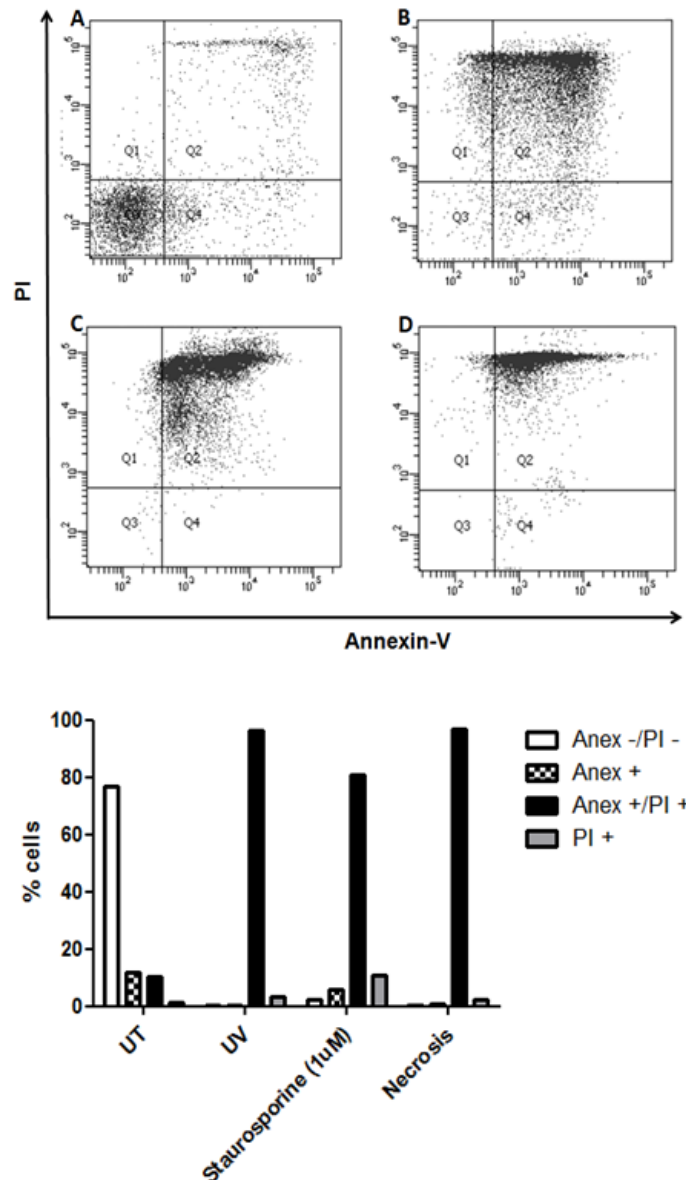

**Supplementary Figure S1.** UV-B irradiation induces cell death in Peripheral Blood Lymphocytes (PBLs). PBLs were stained with PI and annexin-V, and cell death was evaluated by flow cytometry. [A] Untreated cells (UT); [B] staurosporine treatment; [C] heat shock treatment; [D] UV-B light treatment; [E] Distribution of population of stained cells after each condition is represented in bars (n=1, healthy control subject).

Supplementary Figure S2

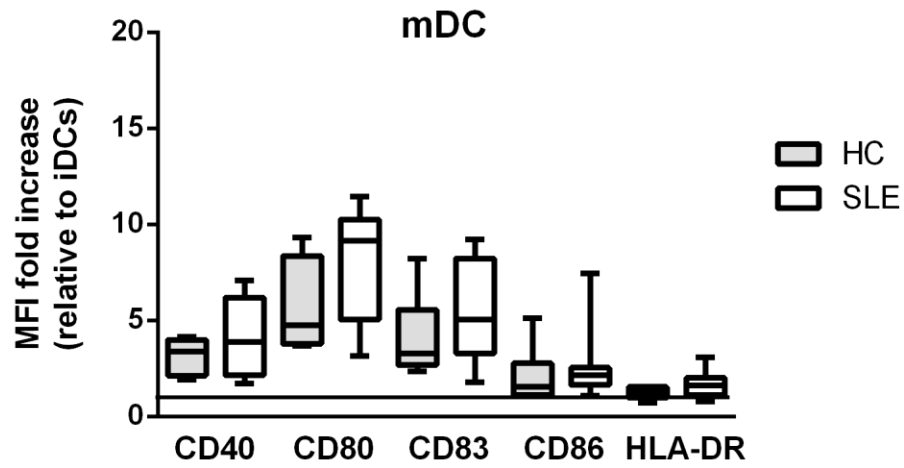

**Supplementary Figure S2.** SLE and HC mature DCs (mDCs) have high expression of co-stimulatory molecules. DCs were differentiated from HC and SLE monocytes in presence of GM-CSF and IL-4. To obtain mDCs 1  $\mu\text{g}/\text{mL}$  LPS was added for 48 hours. The expression of maturation markers was assessed by flow cytometry.

Supplementary Figure S3

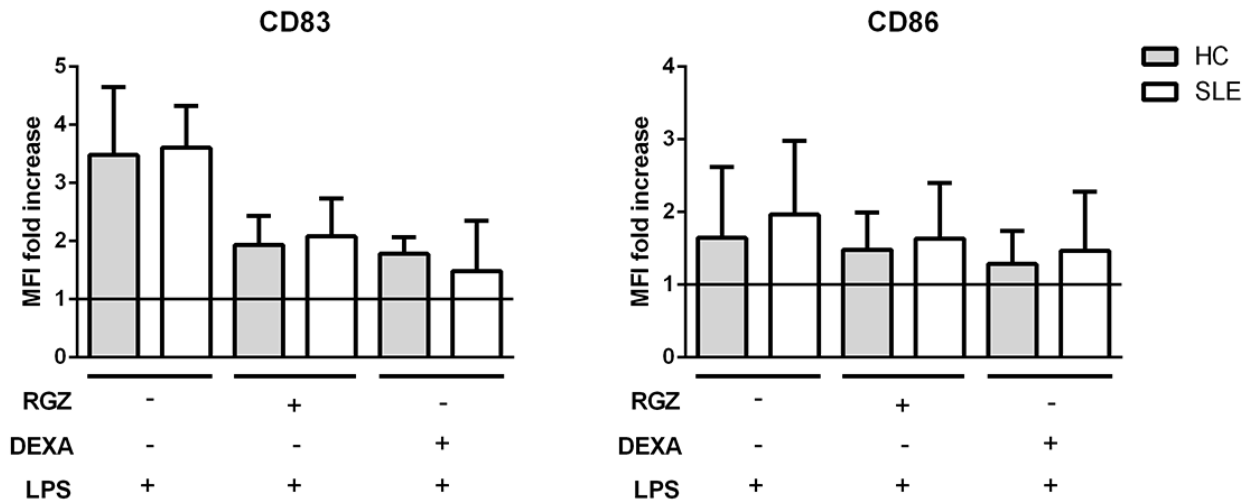

**Supplementary Figure S3.** RGZ or DEXA alone do not prevent LPS-induced maturation of HC or SLE DCs. DCs were treated with 10  $\mu$ M RGZ or 10  $\mu$ M DEXA for 24 hours and then stimulated with 1  $\mu$ g/mL LPS for additional 24 hours. The expression of maturation markers CD83 and CD86 was assessed by flow cytometry. RGZ- and DEXA-treated DCs did not reach a statistical difference after LPS stimulation compared to DCs treated with LPS alone on the expression of CD83 and CD86.

Supplementary Figure S4

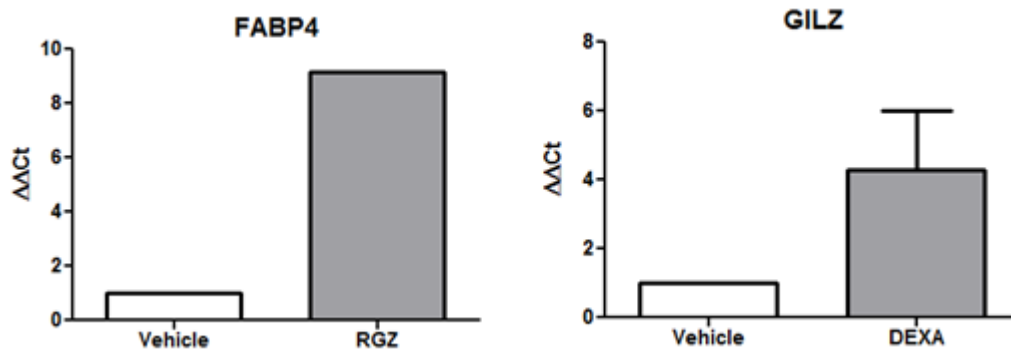

**Supplementary Figure S4.** Immunosuppressant drugs induce the expression of target genes. Expression of FABP4 and GILZ was measured by qPCR using the  $\Delta\Delta C_t$  method in DCs treated with RGZ and DEXA, respectively. n=1 FABP4, n=4 GILZ. p=N.S. Mean $\pm$ SEM.

### Supplementary Figure S5

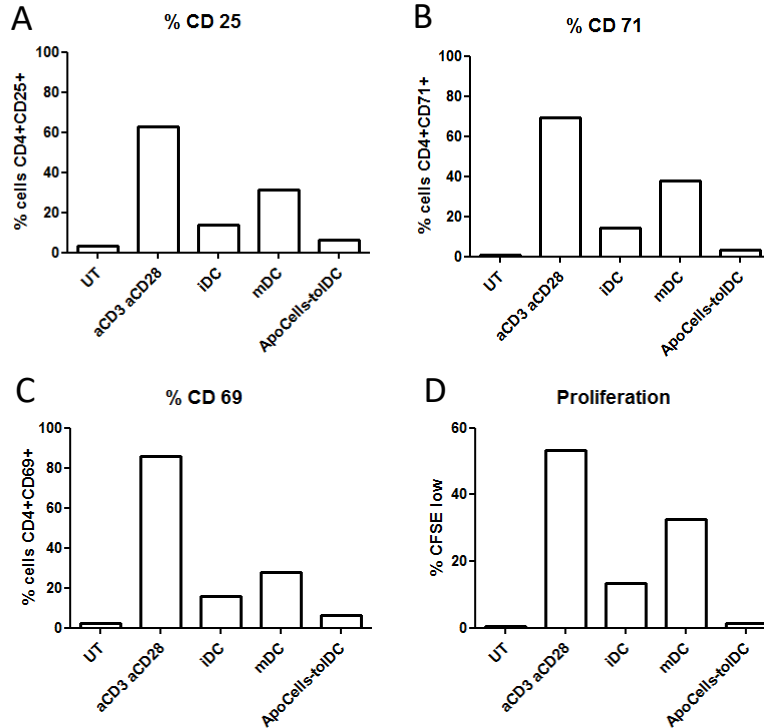

**Supplementary Figure S5.** ApoCells-loaded tolDCs modulate allogeneic activation CD4<sup>+</sup> T-cells from a SLE patient in a MLR assay. SLE CD4<sup>+</sup> T-cells were co-cultured with allogeneic SLE DCs in a 5:1 ratio for 5 days to induce activation of T-cells. Percentage of activation markers [A] CD25, [B] CD71 and [C] CD69 on CD4<sup>+</sup> T-cells is shown as percentage of CD4<sup>+</sup> gated cells. [D] CFSE dilution of CD4<sup>+</sup> T-cells cultured in presence of allogeneic DCs. (n=1).
